# Supplementary material for: Comparison of ingesting a food bar containing whey protein and isomalto-oligosaccharides to carbohydrate on performance and recovery from an acute bout of resistance-exercise and sprint conditioning: an open label, randomized, counterbalanced, crossover pilot study
Source: J Int Soc Sports Nutr. 2019 Aug 13;16:34. doi: 10.1186/s12970-019-0301-z (PMC6693099; doi:10.1186/s12970-019-0301-z)
Supplement: Supplementary file 1 — Table S1. Energy and macronutrient intake, Table S2. Resistance exercise lifting volume, Table S3. Sprint performance, Table S4. Isokinetic testing results, Table S5. Perception of quadriceps muscle soreness, Table S6. Markers of catabolism, Table S7. Stress and sex hormone response, Table S8. Inflammatory marker panel, Table S9. Symptoms of hypoglycemia inventory, Table S10. Appetite and eating satisfaction inventory, Table S11. Readiness to perform questionnaire. (XLSX 39 kb) [file 12970_2019_301_MOESM1_ESM.xlsx]

## Sheet: Supplemental Table 1
	Table S1. Energy and macronutrient intake.
	Nutrients	Baseline			CHO			FB			p-Level
	Calories (kcal)	2248.33	±	461.767	2251.87	±	668.353	2534.04	±	602.69	0.157
	Protein (g)	133.266	±	35.0842	129.741	±	37.8005	145.867	±	45.184	0.337
	Carbohydrates (g)	212.5	±	67.6661	220.977	±	99.5779	243.065	±	58.3041	0.408
	Fat (g)	88.6292	±	18.73	83.6492	±	39.9855	99.8083	±	38.0542	0.26
	Data are means ± standard deviations (SD) or standard error of the mean (SEM). A multivariate analysis revealed no overall Wilks' Lambda time (p=0.508) or treatment x time (p=0.695) effects. Greenhouse-Geisser univariate p-levels are presented for each variable. CHO=Carbohydrate, FB=Food Bar.

## Sheet: Supplemental Table 2
	Table S2. Resistance exercise lifting volume.
	Variable	Treatment	Set 1			Set 2			Set 3				p-Level
	Bench Press (kg)	CHO	718.19	±	124.72	718.19	±	124.72	711.76	±	120.65	Time	0.103
		FB	718.19	±	124.72	718.19	±	124.72	716.3	±	126.32	GxT	0.364
	Squat (kg)	CHO	979	±	163.5	979	±	163.5	979	±	163.5	Time	1
		FB	979	±	163.5	979	±	163.5	979	±	163.5	GxT	1
	Lat Pulldown (kg)	CHO	566.99	±	82.06	566.99	±	82.06	564.72	±	84.45	Time	0.171
		FB	566.99	±	82.06	566.99	±	82.06	564.72	±	84.45	GxT	1
	Leg Press (kg)	CHO	1916.43	±	501.62	1873.71	±	485	1785.64	±	490	Time	0.064
		FB	1916.43	±	501.62	1916.43	±	501.62	1908.49	±	499.82	GxT	0.101
	Incline Bench Press (kg)	CHO	556.78	±	113.49	551.87	±	114.56	537.88	±	115.38	Time	0.002
		FB	585.89	±	108.05	576.06	±	106.38	546.01	±	120	GxT	0.291
	Dumbbell Lunge (kg)	CHO	313.73	±	145.65	311.84	±	149.23	311.84	±	149.23	Time	0.401
		FB	355.31	±	92.42	355.31	±	92.42	362.87	±	79.75	GxT	0.282
	Seated Row (kg)	CHO	612.35	±	103.71	601.01	±	103.71	591.18	±	111.48	Time	0.242
		FB	633.14	±	75.19	633.14	±	75.19	631.25	±	77.26	GxT	0.324
	Leg Extension (kg)	CHO	587.78	±	243.78	584	±	242.95	584	±	242.95	Time	0.328
		FB	699.29	±	138.41	699.29	±	138.41	699.29	±	138.41	GxT	0.328
	DB Biceps Curl (kg)	CHO	132.3	±	45.19	130.03	±	41.85	121.9	±	42.31	Time	0.001
		FB	151.2	±	17.66	139.86	±	25	128.71	±	32	GxT	0.199
	Triceps Pressdown (kg)	CHO	226.8	±	56.8	229.44	±	54.02	228.31	±	55.04	Time	0.413
		FB	233.88	±	45.56	232.56	±	46.89	230.01	±	48.19	GxT	0.2
	Biceps Curl (kg)	CHO	221.88	±	55.3	219.24	±	54.13	217.72	±	54.4	Time	0.032
		FB	229.44	±	45.46	223.03	±	51.09	220.37	±	53	GxT	0.492
	Total Lifting Volume (kg)	CHO	6832.25	±	1145.14	6765.34	±	1161.74	6633.98	±	1245.09	Time	0.012
		FB	7068.78	±	1102.68	7039.86	±	1115.03	6987.03	±	1147.32	GxT	0.407
	Data are means ± standard deviations (SD) in lifting volume (repetitions x weight lifted in kg) or standard error of the mean (SEM). A multivariate analysis revealed overall Wilks' Lambda time (p=0.010) and treatment x time (p=0.808). Greenhouse-Geisser univariate p-levels are presented for each variable. CHO=Carbohydrate, FB=Food Bar, DB=Dumb bel, GxT represents treatment x time interaction.

## Sheet: Supplemental Table 3
	Table S3. Sprint performance.
	Variable	Treatment	Sprint 1				Sprint 2			Sprint 3			Effect	p-Level
	Nebraska Agility Drill (sec)	CHO	7.01		±	0.68	6.89	±	0.49	6.74	±	0.45	Time	<0.001
		FB	7.02		±	0.46	6.81	±	0.43	6.71	±	0.46	GxT	0.67
	Forty Yard Dash (sec)	CHO	5.5		±	0.38	5.41	±	0.32	5.39	±	0.24	Time	0.252
		FB	5.35		±	0.25	5.33	±	0.19	5.36	±	0.24	GxT	0.208
	Data are means ± standard deviations (SD). GLM multivariate analysis revealed overall Wilks' Lambda time (p<0.001) and treatment x time (p=0.437) effects. Greenhouse-Geisser univariate p-levels are presented for each variable. CHO=Carbohydrate, FB=Food Bar, GxT = treatment x time interaction.

## Sheet: Supplemental Tale 4
	Table S4. Isokinetic testing results.
		Variable	Treatment		Fasted			Post-Exercise					48-h Recovery			Effect		p-Level
	Extension	MVC Extension Torque (Nm)	CHO	87.8		±	13.3	85.4		±	20.7	84.1		±	20.1	Time		0.454
			FB	89.6		±	21.1	85.6		±	19.3	87		±	18.5	GxT		0.882
		MVC Extension Force (N)	CHO	432.8		±	75	419.8		±	107.4	412.9		±	103.1	Time		0.442
			FB	439.2		±	102.6	420.4		±	96.7	425.8		±	85.5	GxT		0.892
		MVC Extension Power (W)	CHO	67.8		±	9.6	66.3		±	17.5	63.9		±	15.8	Time		0.381
			FB	70.3		±	16.8	66.2		±	15.6	67.6		±	15.9	GxT		0.744
		MVC Extension Work (J)	CHO	71.6		±	11.1	71.3		±	20.8	66.8		±	14.7	Time		0.443
			FB	75.9		±	19.6	71.4		±	18.2	72.8		±	19.4	GxT		0.609
	Flexion	MVC Flexion Torque (Nm)	CHO	56.4		±	15.8	59.8		±	17.5	57		±	20.7	Time		0.128
			FB	59.4		±	20.2	61.2		±	20.4	57.2		±	18.8	GxT		0.69
		MVC Flexion Force (N)	CHO	275.9		±	73.7	292.5		±	80.9	276.5		±	88	Time		0.105
			FB	288.6		±	81.3	296.7		±	81.7	278.3		±	76.5	GxT		0.761
		MVC Flexion Power (W)	CHO	31		±	9.4	32.8		±	10.4	31.1		±	12.6	Time		0.466
			FB	32.7		±	12	33.4		±	12.6	32		±	12.1	GxT		0.887
		MVC Flexion Work (J)	CHO	49.8		±	15.4	52.9		±	18.3	49.9		±	19.5	Time		0.38
			FB	53.5		±	19	55		±	20.8	52.1		±	19.7	GxT		0.912
	Data are means ± standard deviations (SD). GLM multivariate analysis revealed overall Wilks' Lambda time (p=0.352) and treatment x time (p=0.837) effects. Greenhouse-Geisser univariate p-levels are presented for each variable. CHO=Carbohydrate, FB=Food Bar, MVC=Maximal Voluntary Contraction, GxT= treatment x time interaction.

## Sheet: Supplemental Table 5
	Table S5. Perception of quadricep muscle soreness.
	Variable	Treatment	Pre-Exercise			Post-Exercise			48-hr Post			Effect	p-Level
	Distal Vastus Medialis (cm)	CHO	3.31	±	2.51	5.19	±	3.39	6.64	±	2.78	Time	<0.001
		FB	4.09	±	2.5	4.38	±	2.76	6.28	±	2.5	GxT	0.34
	Distal Vastus Lateralis (cm)	CHO	3.64	±	2.59	3.32	±	2.89	5.77	±	3.33	Time	0.002
		FB	2.35	±	1.99	2.51	±	2.32	3.8	±	3.59	GxT	0.489
	Mid-Lateral Vastus Lateralis (cm)	CHO	2.47	±	2.49	3	±	3.22	4.78	±	3.34	Time	0.004
		FB	1.93	±	2.41	2.77	±	2.58	3.46	±	3.1	GxT	0.493
	Data are means ± standard deviations (SD) or standard error of the mean (SEM). A multivariate analysis revealed overall Wilks' Lambda time (p<0.001) and treatment x time (p=0.538) effects. Greenhouse-Geisser univariate p-levels are presented for each variable. CHO=Carbohydrate, FB=Food Bar, GxT= treatment x time interaction.

## Sheet: Supplemental Table 6
	Table S6. Markers of catabolism.
		Treatment	Fasted						Post-Exercise						48-hr Post				Effect	p-Level
	BUN (mmol/L)	CHO	6.6	±		1.79		6.39		±		1.54		5.38		±	1.76		Time	<0.001
		FB	6.61	±		1.97		6.77		±		1.71		5.72		±	1.25		GxT	0.564
	Creatinine (umol/L)	CHO	94.7	±		14.9		112.1		±		22.2		97.8		±	10.9		Time	<0.001
		FB	95.1	±		15.6		108.7		±		18		91.8		±	15.2		GxT	0.382
	BUN/ Creatinine Ratio	CHO	14.35	±		3.72		11.95		±		3.42		11.26		±	3.62		Time	0.001
		FB	14.25	±		3.92		12.96		±		3.58		13.1		±	3.98		GxT	0.166
	LDH (U/L)	CHO	150	±		21		172		±		31		153		±	23		Time	<0.001
		FB	149	±		15		176		±		30		153		±	18		GxT	0.675
	CK (U/L)	CHO	289	±		229		446		±		232		480		±	644		Time	0.038
		FB	221	±		104		396		±		144		428		±	374		GxT	0.94
	Data are means ± standard deviations (SD). GLM multivariate analysis revealed overall Wilks' Lambda time (p<0.001) and treatment x time (p=0.360) effects. Greenhouse-Geisser univariate p-levels are presented for each variable. CHO=Carbohydrate, FB=Food Bar, BUN=blood urea nitrogen, CK=creatine kinase, LDH=lactate dehydrogenase, GxT represents group x time interaction.

## Sheet: Supplemental Table 7
	Table S7. Stress and sex hormone response.
	Variable	Treatment	Fasted			Post-Exercise			48-hr Post			Effect	p-Level
	Cortisol (ug/dL)	CHO	15.5	±	2	14.2	±	5.7	15.9	±	2.5	Time	0.403
		FB	16.6	±	1.8	14.9	±	6.3	15.3	±	2.4	GxT	0.644
	Testosterone (ng/mL)	CHO	495	±	161	401	±	192	466	±	163	Time	<0.001
		FB	503	±	187	376	±	186	458	±	194	GxT	0.635
	CTR	CHO	28	±	11.5	33.6	±	20.2	29.4	±	8.8	Time	0.112
		FB	28.7	±	8	36.2	±	16.8	29	±	8.9	GxT	0.819
	Data are means ± standard deviations (SD). GLM multivariate analysis revealed overall Wilks' Lambda time (p<0.001) and treatment x time (p=0.914) effects. Greenhouse-Geisser univariate p-levels are presented for each variable. CHO=Carbohydrate, FB=Food Bar, CTR=cortisol to testosterone ratio, GxT represents group x time interaction.

## Sheet: Supplemental Table 8
	Table S8. Inflammatory marker panel.
	Variable	Treatment	Fasted			Post-Exercise			48-hr Post			Effect	p-Level
	IFNy (pg/mL)	CHO	13.6	±	7.7	13.4	±	7.4	13.3	±	7.1	Time	0.46
		FB	13.3	±	7.1	13.6	±	7.2	12.8	±	6.5	GxT	0.569
	IL-13 (pg/mL)	CHO	10.5	±	13.7	10.3	±	13.6	10.5	±	14.9	Time	0.584
		FB	11.2	±	16.6	10.9	±	16.1	10.7	±	15.4	GxT	0.563
	IL-1ß (pg/mL)	CHO	1.25	±	0.81	1.19	±	0.73	1.22	±	0.79	Time	0.268
		FB	1.24	±	0.83	1.21	±	0.77	1.17	±	0.78	GxT	0.472
	IL-4 (pg/mL)	CHO	26.5	±	15.1	25.5	±	14.2	26.2	±	14.6	Time	0.176
		FB	27.2	±	13.5	26.3	±	13.8	25.6	±	13.7	GxT	0.371
	IL-6 (pg/mL)	CHO	2.96	±	1.34	3.22	±	1.29	3.16	±	1.3	Time	0.128
		FB	3.02	±	1.25	3.26	±	1.29	2.95	±	1.23	GxT	0.437
	IL-8 (pg/mL)	CHO	3.58	±	0.95	4.12	±	1.19	3.57	±	1.19	Time	0.001
		FB	3.69	±	0.94	4.36	±	1.41	3.42	±	1.17	GxT	0.571
	TNFα (pg/mL)	CHO	5.3	±	2.1	5.43	±	2.16	5.26	±	2.09	Time	0.044
		FB	5.31	±	1.93	5.65	±	2.34	4.92	±	2.14	GxT	0.261
	Data are means ± standard deviations (SD). A multivariate analysis revealed overall Wilks' Lambda time (p=0.037), treatment x time (p=0.985) effects. Greenhouse-Geisser univariate p-levels are presented for each variable. CHO=Carbohydrate, FB=Food Bar, GxT represents group x time interaction.

## Sheet: Supplemental Table 9
	Table S9. Appetite and eating satisfaction inventory
	Variable	Treatment	Fasted			Mid-Exercise			Post-Exercise			Effect	p-Level
	Appetite	CHO	6.08	±	3.09	4	±	3.54	5.42	±	3.26	Time	<0.001
		FB	6.92	±	1.93	4.5	±	1.73	5	±	1.91	GxT	0.43
	Hunger	CHO	6	±	3.13	4.83	±	3.13	5.25	±	3.33	Time	<0.001
		FB	7.17	±	2.21	3.83	±	2.44	4.75	±	1.86	GxT	0.094
	Satisfaction from Food	CHO	3.58	±	2.81	2	±	1.65	2.33	±	1.92	Time	0.656
		FB	2.58	±	3.32	3.83	±	3.01	4.67	±	2.93	GxT	0.085
	Feeling of Fulllness	CHO	2.33	±	2.57	2.42	±	2.31	2.5	±	2.71	Time	0.017
		FB	2.17	±	2.33	4.83	±	2.59 *†	5.08	±	2.07 *†	GxT	0.032
	Amount of Energy	CHO	5.33	±	1.72	4.17	±	1.7	5.33	±	1.61	Time	0.192
		FB	5.5	±	2.07	5.58	±	1.62	6	±	2.13	GxT	0.357
	Data are means ± standard deviations (SD) or standard error of the mean (SEM). A multivariate analysis revealed overall Wilks' Lambda time (p=0.007) and treatment x time (p=0.152) effects. Greenhouse-Geisser univariate p-levels are presented for each variable. CHO=Carbohydrate, FB=Food Bar, GxT represents group x time interaction. * denotes p<0.05 difference from baseline. † p<0.05 difference bet…

## Sheet: Supplemental Table 10
	Table S10. Symptoms of hypoglycemia inventory
	Variable	Treatment	Fasted			Mid-Exercise			Post-Exercise			Effect	p-Level
	Hypoglycemia	CHO	0.83	±	2.04	1.67	±	1.87	1	±	1.76	Time	0.001
		FB	0.58	±	0.9	2.08	±	2.02	0.92	±	1.56	GxT	0.465
	Dizziness	CHO	0.83	±	2.04	1.25	±	1.66	0.5	±	1.24	Time	0.001
		FB	0.33	±	0.78	2	±	2.04	0.58	±	1.24	GxT	0.095
	Headache	CHO	0.33	±	0.65	0.67	±	1.15	0.5	±	0.9	Time	0.384
		FB	0.17	±	0.39	0.33	±	0.89	0.33	±	0.89	GxT	0.804
	Fatigue	CHO	1.75	±	2.22	4.25	±	2.56	3.67	±	2.67	Time	<0.001
		FB	1.25	±	1.29	4	±	2.86	3.17	±	2.29	GxT	0.964
	Stomach Upset	CHO	0.5	±	1	1.17	±	1.53	0.83	±	1.64	Time	0.004
		FB	0.5	±	0.8	2.33	±	2.81	0.5	±	1	GxT	0.104
	Data are means ± standard deviations (SD) or standard error of the mean (SEM). A multivariate analysis revealed overall Wilks' Lambda time (p<0.001) and treatment x time (p=0.269) effects. Greenhouse-Geisser univariate p-levels are presented for each variable. CHO=Carbohydrate, FB=Food Bar, GxT represents group x time interaction.

[truncated: 1 more sheets: Supplemental Table 11]
